# Supplementary material for: Detection of methicillin-resistant Staphylococcus aureus using phage amplification combined with matrix-assisted laser desorption/ionization mass spectrometry
Source: PubMed Central journal article supplement (PMC5258805; doi:10.1007/s00216-016-0070-3), 2016-11-19
Supplement: 216_2016_70_MOESM1_ESM.pdf [file 216_2016_70_MOESM1_ESM.pdf]

**Analytical and Bioanalytical Chemistry**

**Electronic Supplementary Material**

**Detection of methicillin-resistant *Staphylococcus aureus* using phage amplification  
combined with matrix-assisted laser desorption/ionization mass spectrometry**

Jon C. Rees, John R. Barr

**Table S1** List of all peptide sequences found for a tryptic digest of Phage K by LC-MS/MS followed by database searching. Peptides used for MALDI-MS identification of Phage K are highlighted in yellow

|                                          |                                       |
|------------------------------------------|---------------------------------------|
| Accession gi   48696433                  | Description - Putative capsid protein |
| Sequence                                 | Actual Mass                           |
| (K)SFQ <b>TGYG</b> ITPDTQIDAGALR(R)      | <b>2,110.03</b>                       |
| (K)EIGVAPVSDPNIR(Q)                      | 1,365.73                              |
| (K)NMSIASGLVNNIADPSQILTEDAIAVVAK(T)      | 2,953.55                              |
| (K)TIEWASFYGDASLTSEVEGEGLEFDGLAK(L)      | 3,120.45                              |
| (K)HLNEAAVR(I)                           | 908.4836                              |
| (K)GFGTATDAYMPIGVHAD <b>FVNSILGR(Q)</b>  | <b>2,608.29</b>                       |
| (K)LHGSTMENELILDES <b>LQPLNAPQPAK(V)</b> | 3,040.56                              |
| (K)GAFENEEDR(A)                          | 1,065.44                              |
| (K)LSINVNAMYQQ <b>QPQFVSIYR(Q)</b>       | <b>2,398.22</b>                       |
| (K)DAQEDGTIVFVDK(N)                      | 1,435.68                              |
|                                          |                                       |
| Accession gi   48696453                  | ORF65                                 |
| Sequence                                 | Actual Mass                           |
| (K)VLFNPDRPLQQAELNEMQSIDQYYLK(N)         | 3,151.58                              |
| (R)IVTPDEDASLLDQTSQVPSYFSK(G)            | 2,468.21                              |
| (K)DYEVTQGEGLSK(K)                       | 1,425.66                              |
| (R)TLEEMIEFIR(I)                         | 1,279.65                              |
| (K)GSEDGTIMTDAK(G)                       | 1,223.54                              |
| (K)NANSTSATTYTAQGR(K)                    | 1,541.71                              |
| (R)VTVNLVDPLAQSFQYDENR(T)                | 2,207.09                              |
| (K)WEPIGNYQDL <b>DVLGLAR(Q)</b>          | 1,957.99                              |
|                                          |                                       |

|                                  |             |
|----------------------------------|-------------|
| Accession gi   48696481          | ORF95       |
| Sequence                         | Actual Mass |
| (K)NVNDVLQQESVTVADK(Y)           | 1,757.88    |
| (K)DSLEHAHEDVIADFPASPAR(K)       | 2,176.02    |
| (K)GVDSGEGQGDTSEPSAPK(N)         | 1,716.74    |
|                                  |             |
| Accession gi   48696454          | ORF66       |
| Sequence                         | Actual Mass |
| (K)GAPSGEATAGFVR(L)              | 1,218.60    |
| (K)ELTESTTQYATLVNPPK(E)          | 1,890.96    |
| (R)EITASEITTEWK(K)               | 1,406.69    |
| (K)GNGAVVYYALPK(L)               | 1,250.66    |
|                                  |             |
| Accession gi   48696456          | ORF68       |
| Sequence                         | Actual Mass |
| (M)ALNFTTITENNVIR(D)             | 1,604.86    |
| (R)DDGSASFLLVYTSDSK(T)           | 1,800.85    |
| (K)TFQQAIIHDHIDR(T)              | 1,455.75    |
| (K)ELWTGAQSFLSTGTTK(N)           | 1,725.86    |
| (K)GSTWTLVDSAVQNSK(T)            | 1,591.79    |
|                                  |             |
| Accession gi   48696432          | ORF43       |
| Sequence                         | Actual Mass |
| (K)EAQEQGEKVESEEEVAEGNEDEEVEK(S) | 2,819.22    |
| (K)VESEEEVAEGNEDEEVEK(S)         | 1,919.82    |
|                                  |             |

|                           |             |
|---------------------------|-------------|
| Accession gi   48696452   | ORF64       |
| Sequence                  | Actual Mass |
| (K)WVYLESSIVGDELPLGTYR(Q) | 2,196.12    |
| (K)FNLVPSEVESTGTLFFDNK(Q) | 2,256.14    |

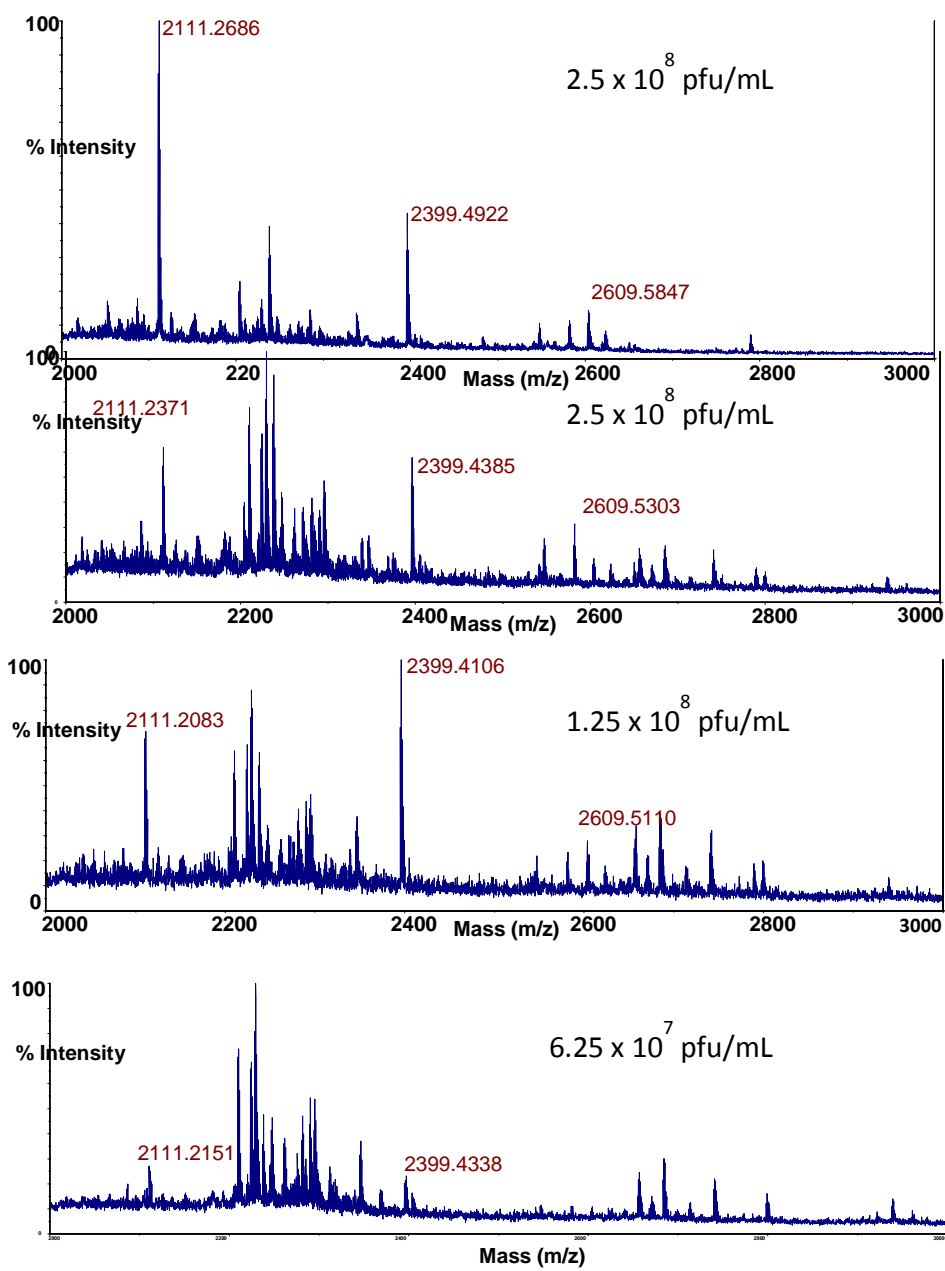

**Fig. S1** Dilution series of bacteriophage K as detected by MALDI-MS

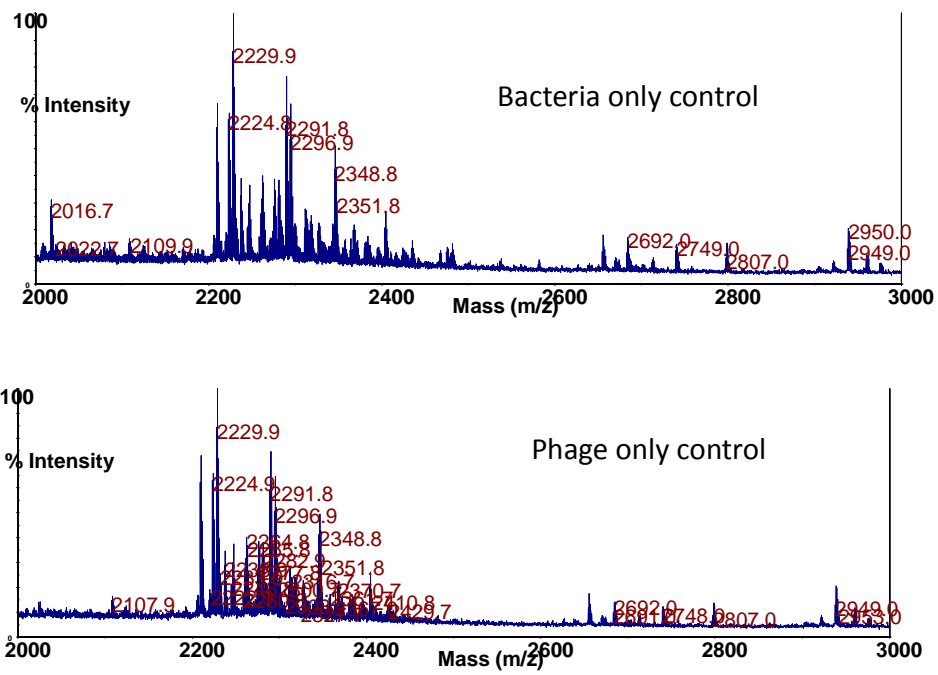

**Fig. S2** Control spectra from samples containing bacteria only and phage only processed after a 5 hour incubation. Peaks associated with phage amplification cannot be found in either spectrum
